# Supplementary material
Source: PubMed Central journal article supplement (PMC3988221)
Supplement: NIHMS569716-supplement-01.pdf [file NIHMS569716-supplement-01.pdf]

## **I. Supplemental Figures and Legends**

### A. DNA methylation at Housekeeping, Group DL or Group E loci

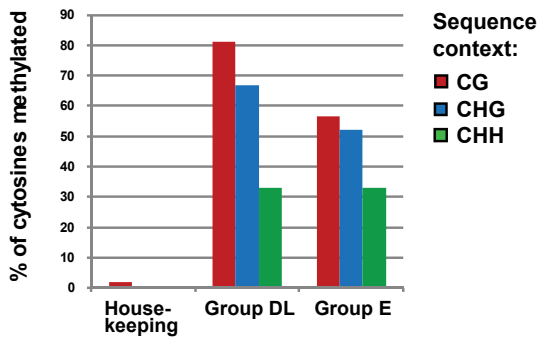

### B. Derepressed transposable elements

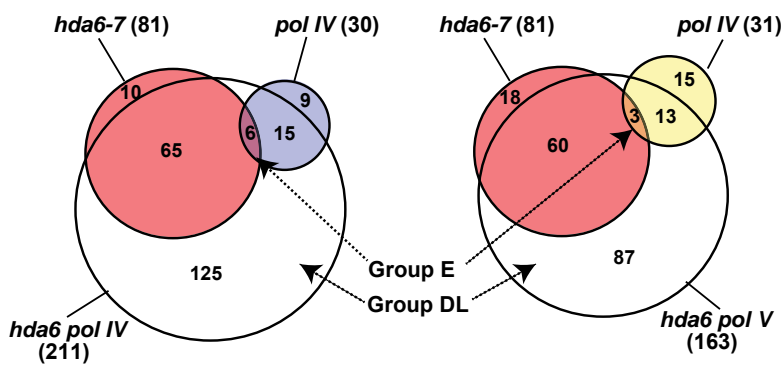

### C. Derepressed genes

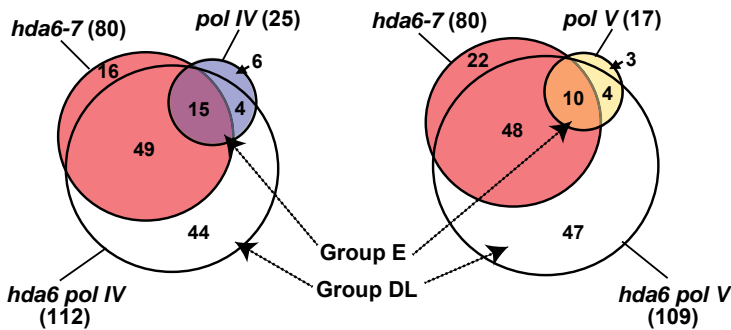

### D. RT-PCR assays of additional Group E loci

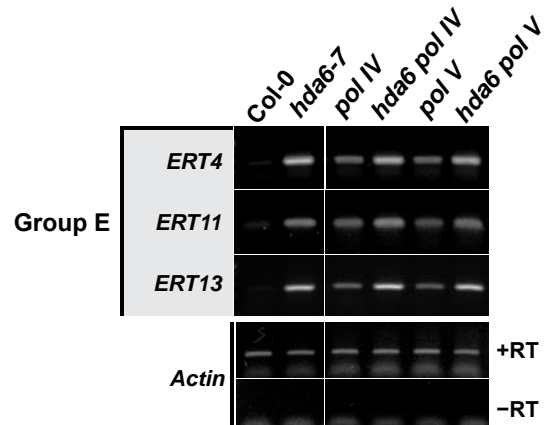

### E. RT-PCR analyses in three hda6 null mutants

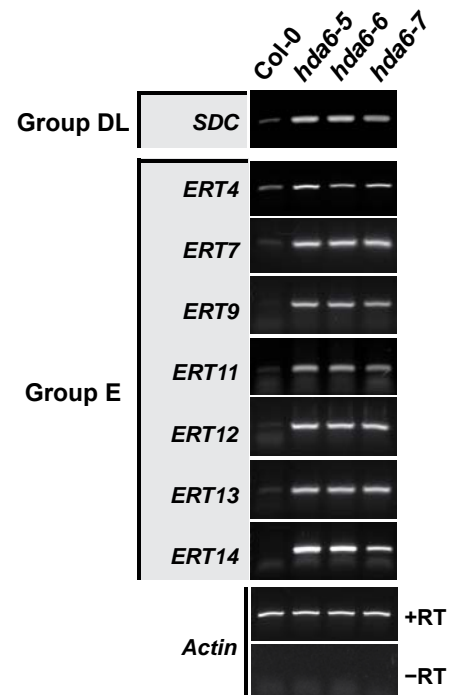

### Figure S1, Related to Figure 1. Loci derepressed in hda6, pol IV or pol V mutants.

(A) DNA methylation at housekeeping genes, Group DL or Group E loci. Bar graphs show the percentage of CG, CHG or CHH sites that were >10% methylated in wild-type Col-0, at loci of three different expression groups: housekeeping genes, Group DL loci and Group E loci (see Table S1C for a list of loci in each group). The analysis was performed using genome-wide bisulfite sequencing data of Stroud et al., 2013.

(B and C) Venn diagrams showing derepressed TEs (B) and derepressed genes (C) as separate categories of derepressed loci (TEs and genes were grouped in Figure 1B of the main paper). In all Venn analyses, uniquely-mapped, polyA+ reads were used to evaluate derepression of loci by comparing total counts at each locus in the mutant relative to Col-0, with a minimum 4-fold increase in the mutant and p value < 0.01. All RNA-seq data were normalized to the total number of mapped reads in each sample.

(D and E) RT-PCR analyses of Group E loci and the Group DL locus, *SDC* in wild-type (Col-0) or the indicated mutant backgrounds. *Actin* serves as a loading control. Controls omitting reverse transcriptase (-RT) yielded no amplification products, as shown for *Actin*.

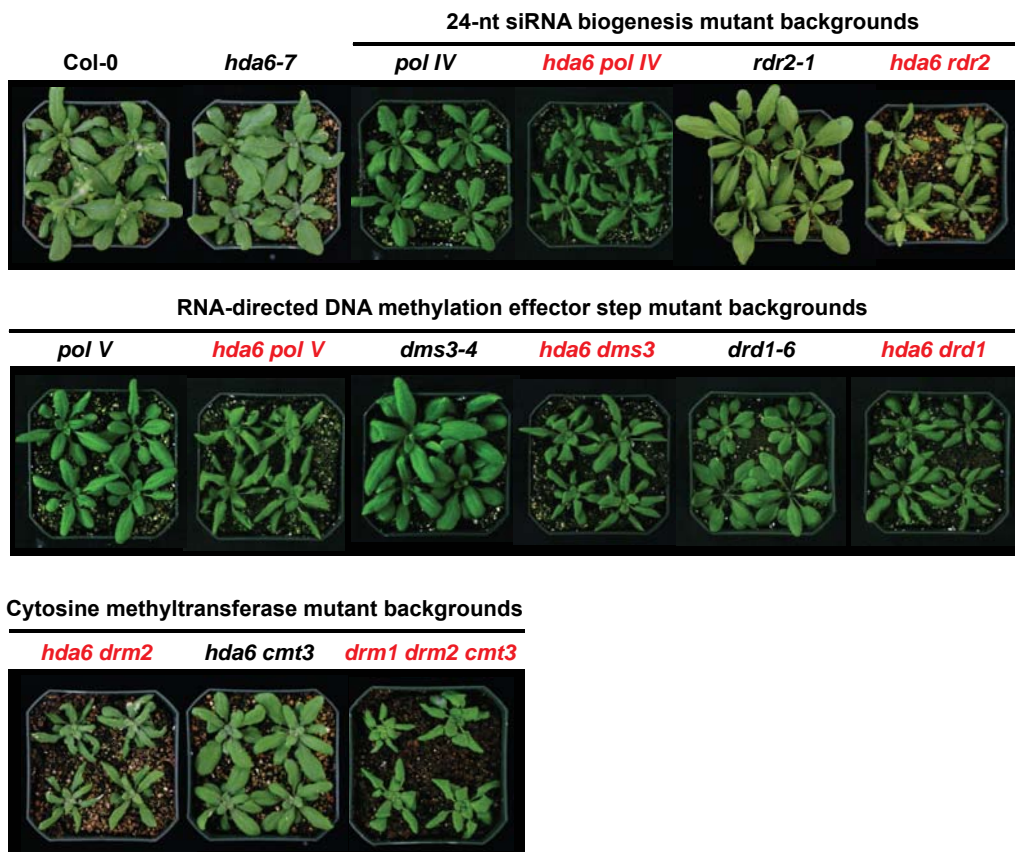

**Figure S2, Related to Figure 2. The *SDC* overexpression phenotype occurs in double mutants pairing *hda6* with RdDM pathway mutants.**

Images of 21-day-old *A.thaliana* plants are shown. Lines displaying the dwarfed and twisted phenotype associated with *SDC* gene overexpression are labeled in red; all are double mutants that harbor *hda6-7* in combination with mutations disrupting known components of the RdDM pathway, with the exception of the *drm1 drm2 cmt3* control. The HDA6-dependence of both CG and CHG maintenance methylation (Earley et al, 2010) may account for *cmt3* and *hda6* mutations being interchangeable for the *SDC*-dependent mutant phenotype given that CMT3 is the major CHG maintenance methyltransferase. This hypothesis is also consistent with the similar, partial derepression of *SDC* in *cmt3* or *hda6* mutants as shown in Figure S3B.

## A. Chop-PCR DNA methylation assays

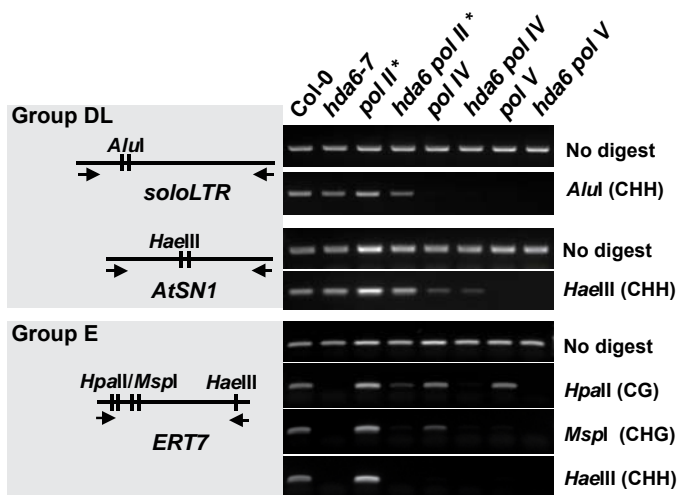

## B. Effects of methyltransferase mutants on Group DL and Group E Loci

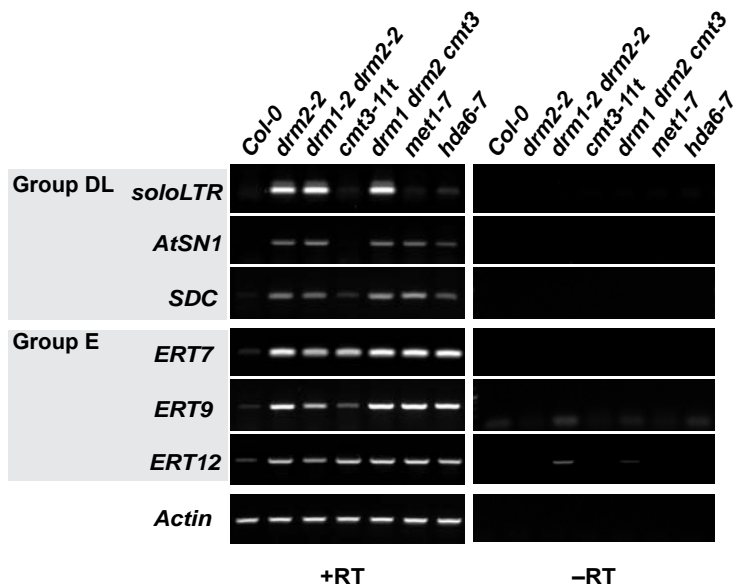

**Figure S3, Related to Figure 3. Cytosine methylation and silencing of Group DL and Group E loci.**

(A) DNA methylation at Group DL and Group E loci, assayed using methylation-sensitive restriction endonuclease digestion followed by PCR (Chop-PCR). Genomic DNA was digested with the indicated methylation-sensitive restriction endonucleases, and then amplified by PCR using primers that flank the endonuclease recognition sites (see diagrams at left). The different enzymes tested report on cytosine methylation in different sequence contexts: *AluI* reports on CHH methylation at two sites in the *soloLTR* locus; *HaeIII* reports on two CHH sites in the *AtSN1* locus; and in the *ERT7* locus, *HpaII* tests CG, *MspI* tests CHG and *HaeIII* tests CHH methylation, where H represents any base other than G. Loss, or decrease, of a PCR product reflects a loss of methylation, such that the DNA is cut by the restriction endonuclease and PCR of the interval fails.

(B) Loss of silencing in cytosine methyltransferase mutants in comparison to *hda6-7*. RT-PCR was used to detect derepression of the indicated loci in mutants for the major cytosine methyltransferases. Actin serves as a loading control. Controls omitting reverse transcriptase (-RT) are at right.

## A. RNA-seq profiles at Group DL loci

■ small RNA  
■ polyA+ RNA  
■ small RNA overlapping polyA+ RNA positions

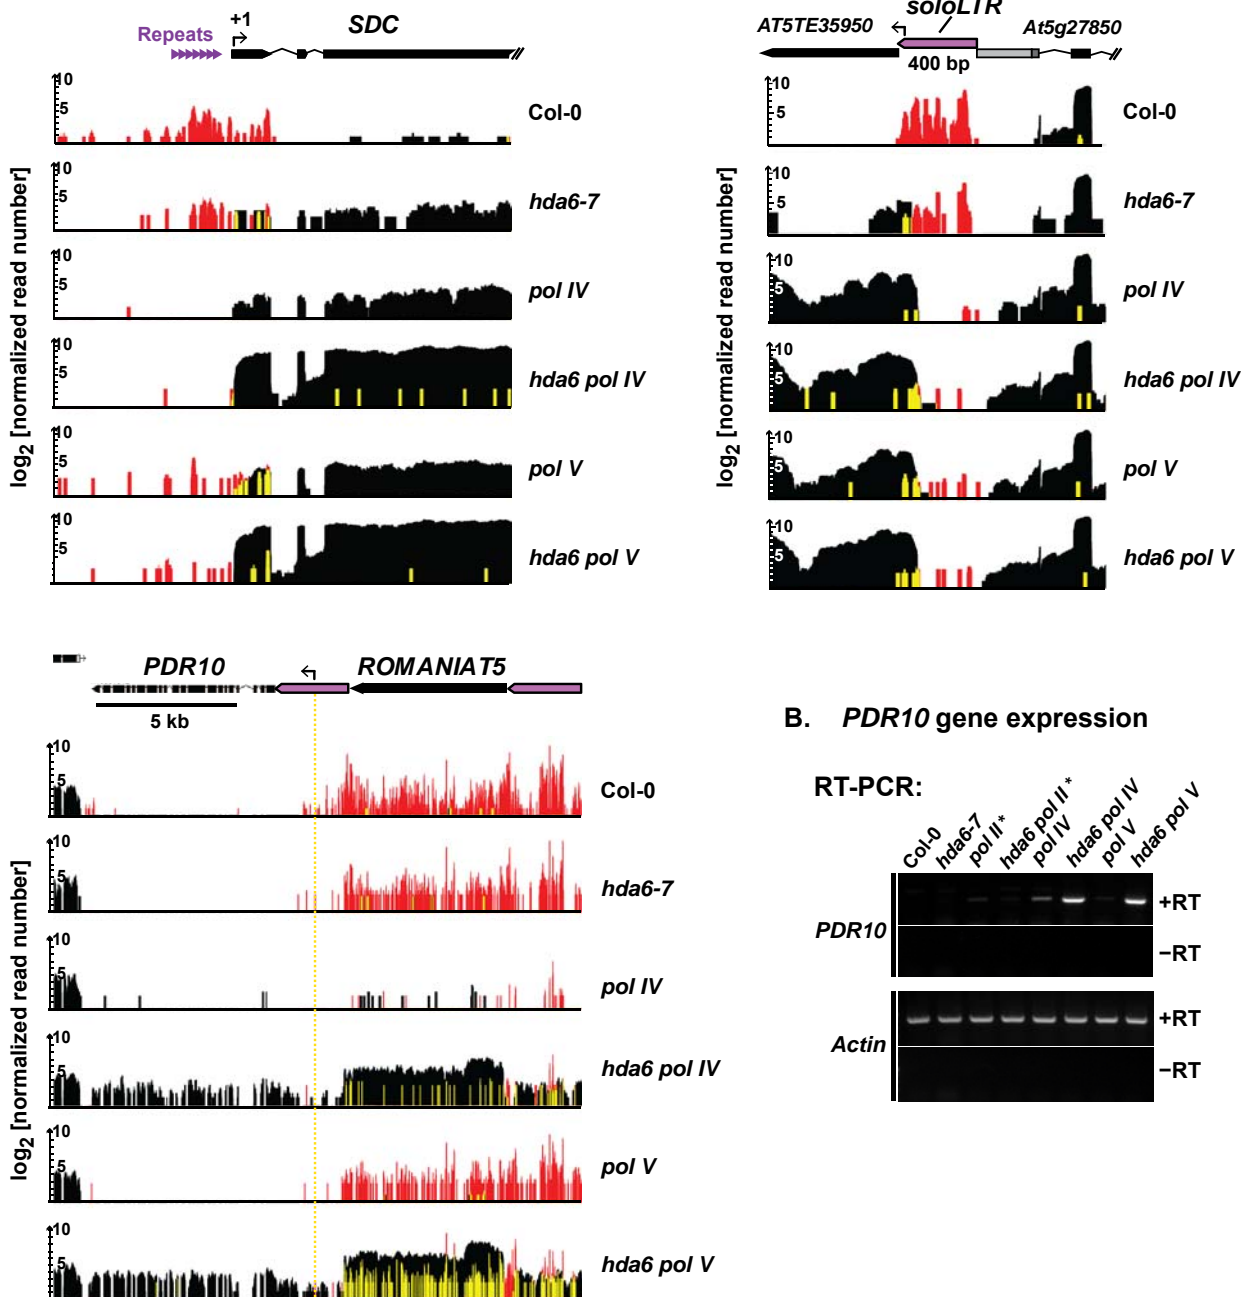

Figure S4, Related to Figure 4.

### RNA-seq and RT-PCR analyses of Group DL locus derepression in *hda6* and/or *pol IV/V* mutants.

(A) RNA-seq profiles at Group DL loci. Data tracks show polyA+ RNA reads (black vertical bars), small RNA reads (red vertical bars) and overlapping read data (yellow vertical bars) detected in the following samples: Col-0, the single mutants: *hda6-7*, *pol IV* and *pol V*, and the double mutants: *hda6 pol IV* and *hda6 pol V*. Repetitive DNA elements (purple) situated upstream of polyA+ RNA transcription units are a source of Pol IV-dependent 24-nt siRNAs in wild-type plants (Col-0). The 3' long terminal repeat (purple) of *ROMANIAT5* overlaps the 5' untranslated region of a protein-coding gene, *PDR10*, whose silencing is double-locked by HDA6 and RdDM. Read counts are normalized by total mapped reads and shown in  $\log_2$  units.

(B) *PDR10* gene expression was confirmed using conventional RT-PCR followed by agarose gel electrophoresis. Controls omitting reverse transcriptase (-RT) are shown below *PDR10* and the *Actin* (loading control) panels.

**A. The RT-PCR assays of Figure 5B, with control reactions performed without reverse transcriptase (- RT) included**

Mutant alleles used in this figure:  
*hda6-5* = *axe1-4*, null for HDA6  
*hda6-6* = *axe1-5*, null for HDA6  
*nrpd1* = null for Pol IV largest subunit  
*nrpe1* = null for Pol V largest subunit

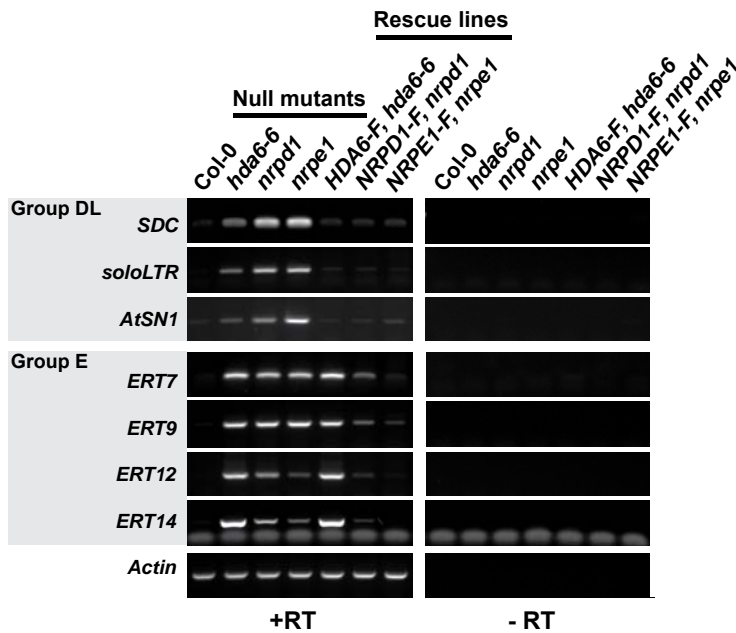

**B. Analysis of lines expressing catalytically inactive HDA6 (RT-PCR)**

**Alignment of deacetylase active site residues**

|       |     |         |      |               |                      |
|-------|-----|---------|------|---------------|----------------------|
| HDLP  | 159 | FKRILYI | DLDA | HHCDGVQEAFYD  | <i>A. aeolicus</i>   |
| RPD3  | 177 | HPRVLYI | IDV  | HHGDGVVEEAFYT | <i>S. cerevisiae</i> |
| HDAC1 | 167 | HQRVLYI | IDI  | HHGDGVVEEAFYT | <i>H. sapiens</i>    |
| HDA19 | 175 | HERVLYV | IDI  | HHGSGVVEEAFYA | <i>Arabidopsis</i>   |
| HDA6  | 179 | FKRVLVI | IDV  | HHGDGVVEEAFYT | <i>Arabidopsis</i>   |

186  
188  
190

Mutated to Alanines  
in transgenic lines:

- HDA6-F (D186A)
- HDA6-F (D188A)
- HDA6-F (D190A)
- HDA6-F (all mutations)

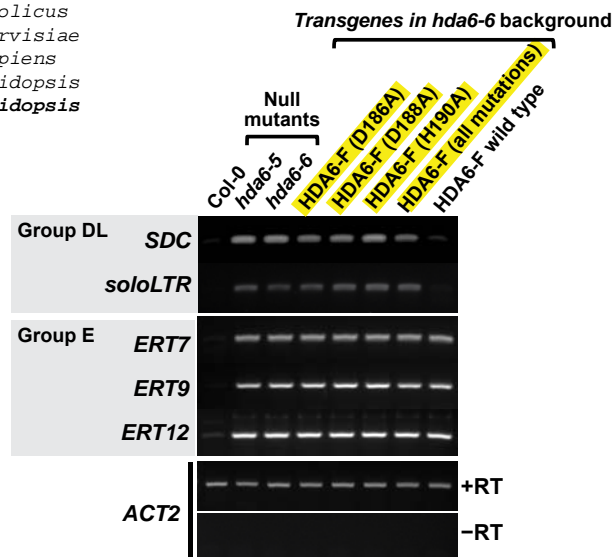

**Figure S5, Controls for Figure 5 and assays indicating histone deacetylase activity of HDA6 is required for silencing Group DL loci.**

(A) Complete version of the RT-PCR assay shown in Figure 5B, including control reactions omitting reverse transcriptase (RT).  
 (B) Analysis of lines expressing catalytically inactive HDA6. Multiple alignment of amino acids in the active sites of the lysine deacetylases Aquifex HDLP, yeast Rpd3, human HDAC1 and *Arabidopsis* HDA6 and HDA19 (top left). The *hda6-6* null mutant was transformed with transgenes that express FLAG epitope-tagged HDA6 (HDA6-F) bearing alanine substitutions at the highlighted amino acids critical for HDA6 activity (D186A, D188A and D190A), or with a wild-type HDA6-F construct (see Earley et al. 2010). RT-PCR assays are shown for expression of Group DL and Group E in transgenic plants expressing the various forms of HDA6. Note that none of the active site mutants of HDA6 can rescue the *hda6-6* null mutation and re-establish silencing of the Group DL loci. By contrast, the wild-type version of the HDA6 transgene does rescue the mutant and restore silencing. At Group E loci, failure to restore silencing results from the loss of silent locus identity, which is not restored simply by restoring HDA6 activity.

## A. Bisulfite sequencing analysis of DNA methylation

### Group DL locus, *soloLTR*:

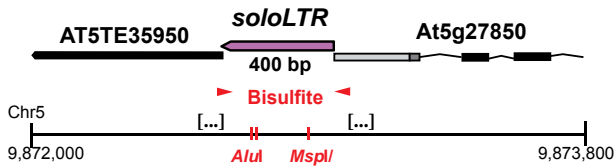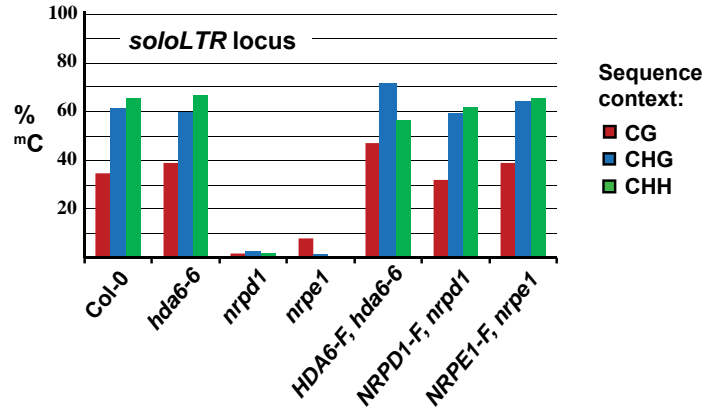

### Group E loci:

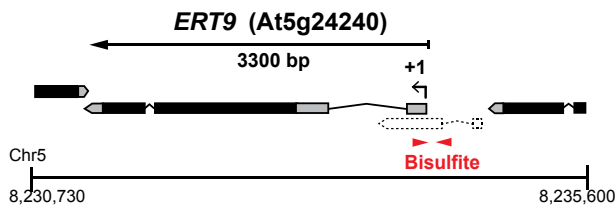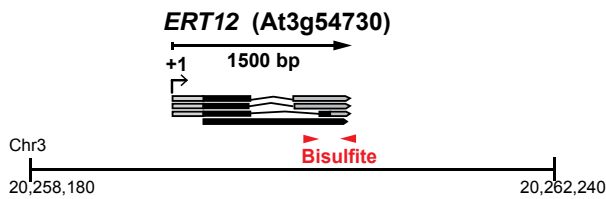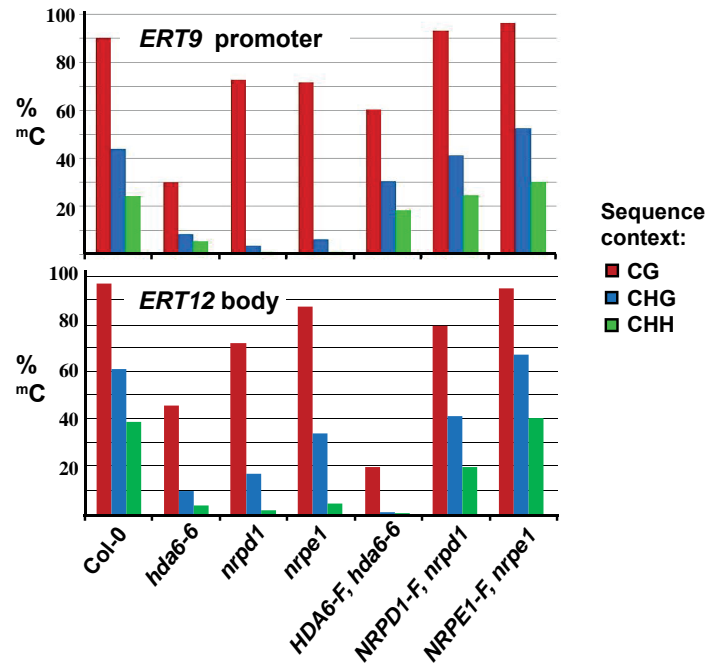

## B. Chop-PCR assay of DNA methylation

### Group E locus:

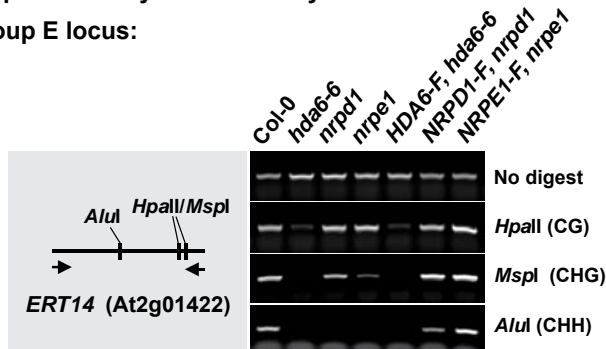

**Figure S6, Related to Figure 5. DNA methylation assays at *soloLTR*, *ERT9*, *ERT12* and *ERT14* loci**

(A) DNA methylation as determined by bisulfite sequencing. Genomic DNA from wild-type Col-0, the single mutants: *hda6-6*, *nrpd1* (*pol IV*) or *nrpe1* (*pol V*), and their respective transgenic rescue lines was subjected to bisulfite conversion. Strand-specific primers were then used to amplify DNA from the Group DL locus *soloLTR*, and from the Group E loci *ERT9* and *ERT12*; the PCR amplicons are indicated by red arrows in the gene diagrams. At least 30 independent clones were sequenced per PCR amplicon. The percentage of methylated cytosines in CG, CHG or CHH contexts (with H being a base other than G), is shown in the bar graphs.

(B) DNA methylation as determined Chop-PCR. Genomic DNA was digested with methylation-sensitive restriction endonucleases, then amplified by PCR using primers that flank endonuclease recognition sites in the *ERT14* locus. The different enzymes tested report on cytosine methylation in different sequence contexts: *HpaII* tests CG, *MspI* tests CHG and *AluI* tests CHH methylation, where H represents any base other than G. Loss of a PCR product reflects a loss of methylation, such that the DNA is cut by the restriction endonuclease and PCR of the interval fails.



### A. Effect of HDA6 rescue on 24-nt siRNA levels

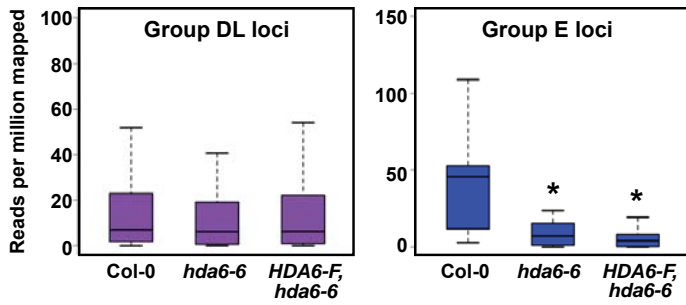

### B. siRNA profiles at Group DL locus, SDC

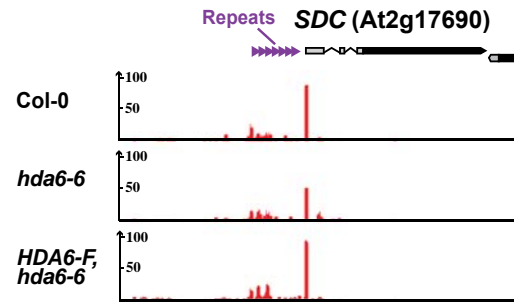

### C. siRNA profiles at Group E loci

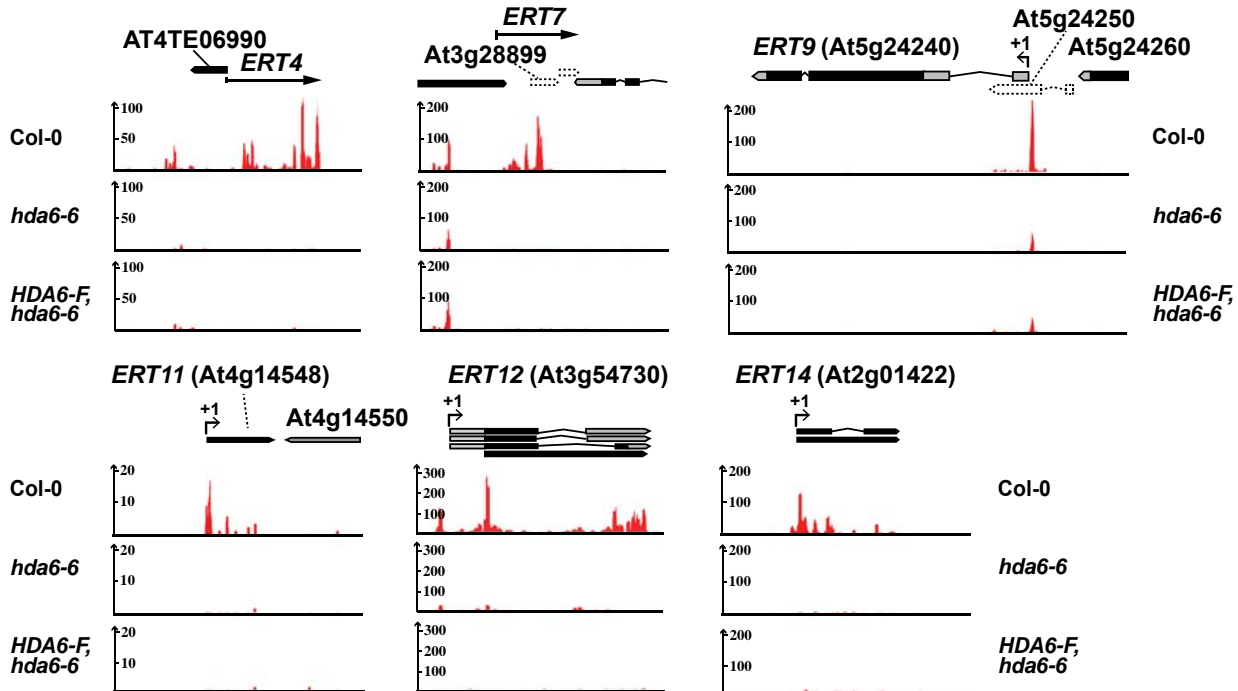

### D. Wilcoxon rank sum tests for statistical significance

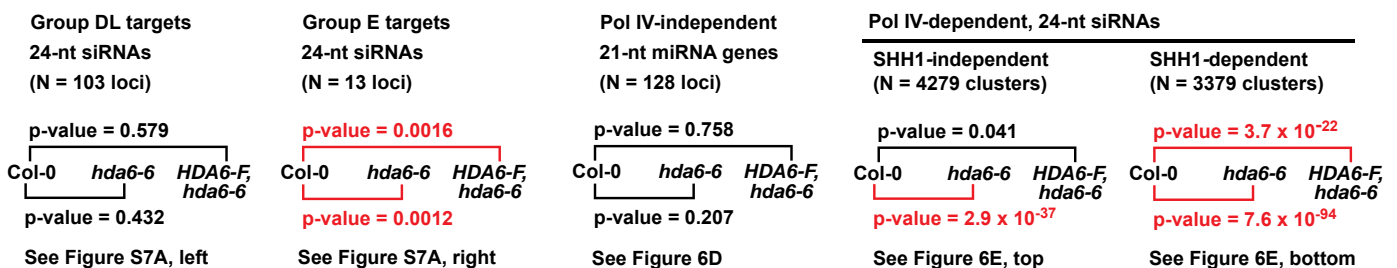

**Figure S7, Related to Figure 6. Small RNA profiles and tests for changes in small RNA abundance at loci silenced by HDA6**  
 (A) Boxplot analysis of the effects of HDA6 mutation and rescue on 24 nt siRNAs generated from Group DL (left panel) or Group E (right panel) loci. All read counts are normalized to total mapped read numbers. Asterisks above boxplots indicate significant reduction relative to Col-0 ( $p < 0.002$ , Wilcoxon rank-sum test).

(B and C) Small RNAs detected at representative Group DL and Group E loci in wild-type Col-0, *hda6-6* and *HDA6-F hda6-6* samples are depicted as red vertical bars. Values are normalized by total mapped reads.

(D) Statistical significance tests for data in Figures 6D, 6E and S7A. Small RNAs detected within functionally-defined clusters were tallied for each sample to obtain per-cluster small RNA abundances (in reads per million mapped). Wilcoxon rank-sum tests for significant shifts in the distribution of small RNA abundance yielded p-values indicated above and below the square brackets. Col-0 vs. mutant comparisons in which we can reject the null hypothesis that no change in small RNA abundance occurred, with  $p < 0.002$ , are marked by asterisks in Figures 6E and S7A. The miRNA gene coordinates are defined in miRbase (Kozomara and Griffiths-Jones, 2011), and the 24-nt siRNA clusters and Pol IV/SHH1-dependencies are defined in (Law et al., 2013).



## II. Supplemental Tables and Legends

**Table S1, Related to Figure 1. Derepressed genes and transposons in mutants defective for HDA6, Pol IV or Pol IV, alone or in combination.**

Gene or transposable element loci derepressed at least 4-fold (log-ratio > 2) in the specified mutant are listed (Worksheets A and B, respectively). Log-ratios are computed as the log base 2 ratio of the per-locus RPKM in the mutant relative to wild-type (Col-0) values. The formula for RPKM is  $(10^9 \times C) / (N \times L)$ , where C is the number of uniquely mapped reads at the locus, N is the total number of uniquely mapped reads in the sample and L is the length of the locus (Mortazavi et al., 2008). If no reads mapped to a locus (C = 0), then C is set to 0.5. P-values for differential expression in each mutant are estimated using a normal distribution with reference to the expected value in Col-0. Loci in the expression groups used for comparative analyses of Group DL, Group E and housekeeping gene loci are listed in Worksheet C.

**Table S2, Related to Extended Experimental Procedures. Oligonucleotide primers used in the study.**

The table shows the gene locus name, locus identifier, primer name, primer sequence and reference (where appropriate) for each oligonucleotide primer or TaqMan probe used in the study.

**RT-PCR assays:**

| Target locus   | AGI #                       | Primer name       | Sequence (5' – 3')                   | Direction | Reference / Notes                           |
|----------------|-----------------------------|-------------------|--------------------------------------|-----------|---------------------------------------------|
| <i>SDC</i>     | At2g17690                   | SDC_RT_F (JP3395) | AATGTAAGTTGTAACCATTGAAACGTGACC       | Fwd       | Johnson et al. 2008                         |
|                |                             | SDC_RT_R (JP3396) | CAGGCATCCGTAGAACTCATGAGC             | Rev       |                                             |
| <i>soloLTR</i> | btwn AT5TE35950 & AT5G27850 | soloLTR-A_F       | ATCAATTATTATGTCATGTTAAAACCG          | Fwd       | Wierzbicki et al. 2008                      |
|                |                             | soloLTR-A_R       | TGTTTCGAGTTTTATTCTCTCTAGTCT          | Rev       |                                             |
| <i>AtSN1</i>   | AT3TE63860                  | AtSN1_A-F         | ACCAACGTGTGTGGCCAGTGGTAAATC          | Fwd       | Herr et al. 2005;<br>Wierzbicki et al. 2008 |
|                |                             | AtSN1_A-R         | AAAATAAGTGGTGGTTGACAAGC              | Rev       |                                             |
| <i>PDR10</i>   | At3g30842                   | PDR10_F           | TGGAATCATCTTTTGGAGCC                 | Fwd       | Yokhongwattana et al. 2010                  |
|                |                             | PDR10_R           | ACTCAACAACCGTCTCACCC                 | Rev       |                                             |
| <i>ERT4</i>    | AT4TE06990 flanking         | ERT4_nRT_F3       | CAAAGTTTTCCCGACTTCATCCTTTGTC         | Fwd       | this study                                  |
|                |                             | ERT4_nRT_R3       | CGCTTCTGTACTTATTATCCAACCTG           | Rev       |                                             |
| <i>ERT7</i>    | At3g28899                   | ERT7_RT_F         | GCCAATCTATCCAAGGCAGAGACG             | Fwd       | this study                                  |
|                |                             | ERT7_RT_R         | TTACACCACATCTGATCCCTTACTCTACC        | Rev       |                                             |
| <i>ERT9</i>    | At5g24240                   | ERT9_RT_F2        | CTTACTCCAATAGACCATTGGCTATTGC         | Fwd       | this study                                  |
|                |                             | ERT9_RT_R2        | GGCTTCTGCATCATGTATGATTTGCTCG         | Rev       |                                             |
| <i>ERT11</i>   | At4g14548                   | ERT11_RT_F3       | CAATAAAGTCTAAATCCTTTCATCTACGG        | Fwd       | this study                                  |
|                |                             | ERT11_RT_R3       | CTTCTTACCCTGTAACGGCGGTGAG            | Rev       |                                             |
| <i>ERT12</i>   | At3g54730                   | ERT12_RT_F        | CAGGCTTTGAGCCCTCTAGATCTGG            | Fwd       | this study                                  |
|                |                             | ERT12_RT_R        | ACTTCGGAGAGGTGTGGGGTTGC              | Rev       |                                             |
| <i>ERT13</i>   | At1g67105                   | ERT13_RT_F3       | TAGACTACATCAAGATAGATGTAATCCGTGG      | Fwd       | this study                                  |
|                |                             | ERT13_RT_R3       | TATCCACGCGTCAGGAATCGAGC              | Rev       |                                             |
| <i>ERT14</i>   | At2g01422                   | ERT14_RT_F3       | CCATTCGTGTTTAGGTTGAGTTAAGTGAGG       | Fwd       | this study                                  |
|                |                             | ERT14_RT_R3       | CACCTGGAAATATAGATTTTATTGATAGAAGATCTG | Rev       |                                             |
| <i>Actin7</i>  | At5g09810                   | Actin_RT_R        | AAGTCATAACCATCGGAGCTG                | Fwd       | Earley et al. 2010                          |
|                |                             | Actin_RT_F        | ACCAGATAAGACAAGACACAC                | Rev       |                                             |

**Droplet Digital RT-PCR assays:**

| Target locus | Forward primer                                 | Reverse primer          | PrimeTime / TaqMan probe     |                                |
|--------------|------------------------------------------------|-------------------------|------------------------------|--------------------------------|
| <i>SDC</i>   | GCGGTTCCAGACATATCCTC                           | AACGCTCCAAATAGTTTGTATGC | AGTTGAACTCTCGTGCTCAAAGATCTGC | PrimeTime Std qPCR assay (IDT) |
| <i>ERT7</i>  | CAATCTATCCAAGGCAGAGACG                         | GCATGGGTGGTGAATAAAC     | CAAAGACCCGAAGGAGTGAGAGCC     | PrimeTime Std qPCR assay (IDT) |
| <i>ACT2</i>  | LifeTech TaqMan Gene Exp. Assay: At02329915_s1 |                         |                              | ABI/LifeTech                   |

**Chop-PCR assays:**

| Target locus   | AGI #                       | Primer name   | Sequence (5' – 3')              | Direction | Primer reference       |
|----------------|-----------------------------|---------------|---------------------------------|-----------|------------------------|
| <i>soloLTR</i> | btwn AT5TE35950 & AT5G27850 | soloLTR-C_F   | ATAAACTCGAAACAAGAGTTTCTFTA      | Fwd       | Wierzbicki et al. 2008 |
|                |                             | soloLTR-C_R   | TAATGGTATTATTTTATGATCAGTGTAT    | Rev       |                        |
| <i>AtSN1</i>   | AT3TE63860                  | AtSN1_A-F     | ACCAACGTGTGTGGCCAGTGGTAAATC     | Fwd       | Wierzbicki et al. 2008 |
|                |                             | AtSN1_A-R     | AAAATAAGTGGTGGTTGACAAGC         | Rev       |                        |
| <i>ERT7</i>    | At3g28899                   | ERT7_Chop_F4  | CGCCGCCGTATTTAGGGTTACC          | Fwd       | this study             |
|                |                             | ERT7_Chop_R4  | GGATAGAAAACGCTCTCGCTTGGATAG     | Rev       |                        |
| <i>ERT14</i>   | At2g01422                   | ERT14_Chop_F1 | GGACCGTTGAATTAATTACACACATTTATCC | Fwd       | this study             |
|                |                             | ERT14_Chop_R1 | CCGGTGTGAGAAAGCCACC             | Rev       |                        |

**Bisulfite sequencing analyses:**

| Target locus   | AGI #                       | Primer name    | Sequence (5' – 3')                                                                                  | Direction | Primer reference          |
|----------------|-----------------------------|----------------|-----------------------------------------------------------------------------------------------------|-----------|---------------------------|
| <i>SDC</i>     | At2g17690                   | JP3551         | TAAGTTTATTATTTGGATTTAAAGYGGATAAATATTA-<br>TTTTAATYAAAAAGTTGGAATGGTTTGGAGAGTTT                       | Fwd       | Henderson & Jacobsen 2008 |
|                |                             | JP3552         | AATCTCTAAAATTTTTTATTTTACTCATTTCTACTTT-<br>AAACCTCTATCTTATAAATACACACAACCCCTAATAT-<br>ATTTTATATTAATAA | Rev       |                           |
| <i>soloLTR</i> | btwn AT5TE35950 & AT5G27850 | soloLTR_bis_F2 | GAYAAATAAATTTTTTATTYAAGTATATTAAGTGTA-<br>GATTATTGTYTYAG                                             | Fwd       | this study                |
|                |                             | soloLTR_bis_R2 | CTCRAAACAAARATTTTCTTATRTRCTTCTTCTTCTC                                                               | Rev       |                           |
| <i>ERT9</i>    | At5g24240                   | ERT9_bis_F1    | GAATTTGGTAATTTTATAGATTTGTYTGATAAAAAGATTTGYG                                                         | Fwd       | this study                |
|                |                             | ERT9_bis_R1    | TCATCRAAACCRATACAATTTCATCATCCATRATC                                                                 | Rev       |                           |
| <i>ERT12</i>   | At3g54730                   | ERT12_bis_F1   | GTTYATYGAGAAAGTGGTGGTTTTYG                                                                          | Fwd       | this study                |
|                |                             | ERT12_bis_R1   | CACTTARATTTTRCTCCCTATCTCTCAC                                                                        | Rev       |                           |

**qPCR for chromatin immunoprecipitation:**

| Target locus   | AGI #                       | Primer name           | Sequence (5' – 3')             | Direction | Primer reference       |
|----------------|-----------------------------|-----------------------|--------------------------------|-----------|------------------------|
| <i>SDC</i>     | At2g17690                   | SDC_ChIP_body1F       | TGACCCTCCAAAACGATAG            | Fwd       | this study             |
|                |                             | SDC_ChIP_body1R       | GAAACCGAGAAAACAGGCATC          | Rev       |                        |
|                |                             | SDC_ChIP_body2F       | GCGTCAACAAGAACCATTCC           | Fwd       |                        |
| <i>SDC</i>     | At2g17690                   | SDC_ChIP_body2R       | GTGTGACGCGAAGAATGTG            | Rev       | this study             |
|                |                             | SDC_ChIP_UpstrF       | TTACCACCTGGACCCAAAAGC          | Fwd       |                        |
| <i>SDC</i>     | At2g17690                   | SDC_ChIP_UpstrR       | AATAGGGTGTGGGCTCTC             | Rev       | this study             |
|                |                             | soloLTR_ChIP_F (A142) | GGATAGAGATGAATGATGGATAATGACA   | Fwd       |                        |
| <i>soloLTR</i> | btwn AT5TE35950 & AT5G27850 | soloLTR_ChIP_R (A143) | TTATTTTGTATCAGTGTATAAACCCGGATA | Rev       | Wierzbicki et al. 2008 |
|                |                             | ERT7_ChIP_bodyF       | CCAATCTATCCAAGGCAGAGACG        | Fwd       |                        |
| <i>ERT7</i>    | At3g28899                   | ERT7_ChIP_bodyR       | TTCAAAGACCCGAAGGAGTG           | Rev       | this study             |
|                |                             | ERT9_ChIP_PromF       | GAAACGGTATCTGCCCTTAC           | Fwd       |                        |
| <i>ERT9</i>    | At5g24240                   | ERT9_ChIP_PromR       | TGACCTCGTGACTTTTGAC            | Rev       | this study             |

### III. Extended Experimental Procedures

**Genetic crosses and transgenic lines:** Crosses were performed to obtain double mutants: *hda6-7 nrpb2-3*, *hda6-7 nrpd1-3*, *hda6-7 nrpd1-3*, *hda6-7 nrpe1-11*, *hda6-7 rdr2-1*, *hda6-7 drm2*, *hda6-7 cmt3-11t*, *hda6-7 dms3-4*, *hda6-7 drd1-6* and triple mutants: *hda6-7 drm2 cmt3*, *hda6-7 nrpd1-3 sdc*, *hda6-7 nrpe1-11 sdc*. *hda6-6* complemented by *302-gHDA6-FLAG* was described in Earley et al. (2010); *302-gNRPD1-FLAG nrpd1-3* and *302-gNRPE1-FLAG nrpe1-11* rescue lines were initially described in Pontes et al. (2006).

**Chromatin Immunoprecipitation (ChIP):** 3 g of 14-day-old rosette leaf tissue was cross-linked in 0.5% formaldehyde, frozen, and ground in 15 mL Honda buffer (0.44 M Sucrose, 1.25% Ficoll, 2.5% Dextran T40, 20 mM Hepes KOH, pH 7.4, 10 mM MgCl<sub>2</sub>, 0.5% Triton X100, 5 mM DTT, 1 mM PMSF, 1% Plant Protease Inhibitor Cocktail (Sigma, IL, USA)). The extract was subjected to centrifugation, the pellet was resuspended in 1 mL Honda buffer, and then cleared by successive washing. The final nuclear pellet was suspended in 1 ml Nuclei Lysis buffer (50mM Tris-HCl, pH 8, 10mM EDTA, 1% SDS, 1mM PMSF, 1% Plant Protease Inhibitor Cocktail), and sonicated such that the average fragment size of DNA was ~500 bp. Chromatin aliquots were combined with 1 mL Dilution Buffer (1.1% Triton X100, 1.2mM EDTA, 167mM NaCl, 16.7 mM Tris-HCl, pH 8) and centrifuged 10 min at 16,000 x g. The supernatant was combined with 5 µL of antibody against H3K9/K14Ac (Millipore Cat # 06-599), H3K9me2 (Upstate Cat #07-441), or HDA6, and incubated at least 3 h at 4°C. 50 µl Protein G Dynabeads (Life Technologies, CA, USA) were added and the mixture incubated for 15 min at RT. Beads were washed five times with Binding/Washing buffer (150mM NaCl, 2mM EDTA, 1% Triton X100, 0.1% SDS, 1mM PMSF, 20mM Tris-HCl, pH 8) and twice with TE (1mM EDTA, 10mM Tris-HCl, pH 8). Cross-links were reversed by adding 100 µl of 10% Chelex (BioRad, CA, USA) to the beads and heating at 99°C for 10 min, then adding 20 µg Proteinase K and incubating at 43°C for 1 hr. Protease K was inactivated by heating to 95°C and samples were concentrated using a PCR purification column (Qiagen, MA, USA).

**RNA sequencing procedures:** For small RNA sequencing, 40 µg total RNA was subjected to 18% polyacrylamide gel electrophoresis. Gel slices were excised for the 15-45 nt size-range, then eluted for library preparation following recommendations of the Illumina Small RNA v1.5 Sample Preparation Guide, except that customized 5'-adapters replaced kit 5' adapters. Briefly, distinct 3' and 5' RNA-DNA hybrid adapters were ligated sequentially to the pool of small RNAs;

ligation products were reverse-transcribed and amplified by PCR. The 3' adapter (Illumina) is optimized for ligation to small RNAs with a 3' hydroxyl group (enzymatically cleaved). Each 5' adapter contained a unique 4-nt index. Final libraries were quantified using Quant-iT Picogreen dsDNA Reagent (Invitrogen). To remove excess adapters, the library pool was excised from a 6% polyacrylamide gel. Templates were assessed by migration on a Bioanalyzer DNA1000 chip (Agilent). The library pool was sequenced to 75 cycles on an Illumina GAIIx using an Illumina v4 small RNA cluster generation kit and v4 reagents. For mRNA sequencing, total RNA preparations were enriched for polyadenylated RNA using DynaBeads Oligo(dT) (Invitrogen) and mRNA-Seq libraries were prepared according to Illumina, with indexed adapters (Illumina Multiplex Sample Prep Oligos) added during amplification. The final library pool (mean modal size 295 bp) was cleaned of excess adapters using Agencourt AMPure XP beads (Beckman Coulter Genomics) and quantified and assessed as above. An equimolar pool (18 ng/ul) was prepared and clustered on a single read flowcell. Sequencing was performed on an Illumina GAIIx instrument using a v2 cluster generation kit, v4 Sequencing reagents and SBS 2.8 instrument software, for 76 cycles + 7 index cycles.

Fasteris SA (<http://www.fasteris.com/>) performed additional small RNA sequencing on the Illumina HiSeq 2000 platform and following the manufacturer's recommended protocols.

**Droplet Digital quantitative RT-PCR:** 1.5 µg of DNase I-treated total RNA isolated from each sample was subjected to random-primed cDNA synthesis using Superscript III reverse transcriptase (Invitrogen) in 20 uL reactions, then diluted to 40 uL. TaqMan assays were assembled in 20 uL aliquots using 1 uL of cDNA. Reactions were combined with 70 uL of Droplet Generation Oil (Bio-Rad) in the QX100 Droplet Generator (Bio-Rad), and then partitioned into approximately 12000-15000 droplets, each ~1 nL. Forty cycles of standard PCR were performed on these emulsions, after which droplets were read as positive or negative for 6-FAM fluorescence on the QX100 Droplet Reader (Bio-Rad). Absolute concentrations were calculated based on the Poisson statistics, and gene expression was quantified relative to the *ACT2* constitutive control. TaqMan probes and primers used for droplet digital PCR are listed in Table S2.

**Bioinformatic analyses:** Illumina reads from non-stranded, polyA+ RNA-seq libraries were aligned to the *A. thaliana* TAIR10 annotated genome reference using Bowtie (V1.1.2) and Tophat (V1.1.2) (Langmead et al., 2009).

**PolyA+ RNA-sequencing stats (perfect matches):**

| Library name            | Mapped     | Platform       | Facility | Source     |
|-------------------------|------------|----------------|----------|------------|
| Col-0 WT1               | 38,981,185 | Illumina GAIIx | CGB (IU) | this study |
| <i>hda6-7</i>           | 15,755,401 | Illumina GAIIx | CGB (IU) | this study |
| <i>pol IV (nrpd1-3)</i> | 20,953,165 | Illumina GAIIx | CGB (IU) | this study |
| <i>hda6 pol IV</i>      | 33,450,389 | Illumina GAIIx | CGB (IU) | this study |
| <i>pol V (nrpe1-11)</i> | 36,353,829 | Illumina GAIIx | CGB (IU) | this study |
| <i>hda6 pol V</i>       | 34,752,676 | Illumina GAIIx | CGB (IU) | this study |

Perfect (100%) matches were tallied at annotated genomic features. Transposable element (TE) expression by family (Figure 1A, 1B) was evaluated by counting family-specific reads, clustering normalized totals with R heatmap.2 and plotting with ggplot2 (Wickham, 2009). For all remaining polyA+ RNA analyses (Figures 1C, S1B, S1C), TAIR10 Representative Gene Models of types “mRNA” and “ncRNA” were considered as “Genes”, whereas coordinates for TAIR10 TEs were refined in Cufflinks using data from the *hda6 pol IV* mutant. Only TEs not overlapping “Genes” were considered. Differential polyA+ RNA expression was assessed with NOISeq (v1.1.5) using RPKM normalization, k=0.5 and q=0.88 settings (Tarazona et al., 2012), taking only uniquely-mapped reads into consideration. Significance (p-values) for differential expression in mutant samples were estimated using a normal distribution (pnorm function in R) with reference to the expected value in wild-type (Col-0). Threshold filters of  $\log_2(\text{mutant/Col-0}) > 2.0$  and  $p < 0.01$  were applied to NOISeq gene lists before Venn diagram generation.

For small RNA analyses, trimmed reads were aligned to the *A.thaliana* reference with Novoalign (v2.05.13; Novocraft).

**Small RNA-sequencing stats (20-25 nt RNAs):**

| Library name            | Mapped    | Platform       | Facility    | Source             |
|-------------------------|-----------|----------------|-------------|--------------------|
| Col-0 WT1 rep1          | 4,457,015 | Illumina GAIIx | CGB (IU)    | this study         |
| <i>hda6-7</i>           | 1,279,965 | Illumina GAIIx | CGB (IU)    | this study         |
| <i>pol IV (nrpd1-3)</i> | 2,568,399 | Illumina GAIIx | CGB (IU)    | this study         |
| <i>hda6 pol IV</i>      | 1,358,721 | Illumina GAIIx | CGB (IU)    | this study         |
| <i>pol V (nrpe1-11)</i> | 1,231,055 | Illumina GAIIx | CGB (IU)    | this study         |
| <i>hda6 pol V</i>       | 1,395,941 | Illumina GAIIx | CGB (IU)    | this study         |
| Col-0 WT1 rep2          | 6,458,512 | Illumina HiSeq | Fasteris SA | this study         |
| <i>hda6-6</i>           | 6,012,373 | Illumina HiSeq | Fasteris SA | this study         |
| <i>HDA6-F, hda6-6</i>   | 7,383,450 | Illumina HiSeq | Fasteris SA | this study         |
| Col-0 (inf)             | 2,641,533 | Illumina GA    | SALK        | Lister et al. 2008 |
| <i>met1-3</i> (inf)     | 1,512,796 | Illumina GA    | SALK        | Lister et al. 2008 |

Perfectly matched, 20-25 nt small RNA inserts were analyzed using a combination of Perl, Python and R scripts to generate the RNA-seq profiles and small RNA size histograms (Figures

2A, 2C, 3A, 4A, 6B, 6C, 7A, S4). Average 24 nt small RNA density at each Gene was computed by dividing the sum of normalized base coverage in a given annotation interval by its total length.  $\log_2$  density ratios (Col-0/*nripd1*) and (Col-0/*hda6*) were approximated after adding pseudo-counts to the numerator and denominator, then plotted in R (Figure 4B). Chromosome-wide density plots (Figure 6A) were generated using the normalized abundance of 24-nt siRNAs in *de novo*-identified clusters (ShortStack, Axtell, 2013) for a 200-kb window stepped in 100-kb increments, and plotting density values distributed along each chromosome as heatmaps in ggplot2. For boxplot analyses, TAIR8 coordinates of siRNA clusters reported by (Law et al., 2013) were converted to corresponding TAIR10 positions, and small RNA reads aligned within these cluster boundaries were counted using ShortStack. Normalized, per-cluster counts were used as input for the R functions boxplot and wilcox.test to obtain Figures 6D, 6E, 7B, S7A and S7D. For profiling DNA methylation at loci divided by expression group (i.e., housekeeping, Group DL or Group E), locations of CG, CHG and CHH sites were computed based on TAIR10 genome annotations and hand annotation of small RNA-generating regions (e.g., those at *SDC*, *AtSN1*, *soloLTR* and *ERT* loci). The number of sites ( $m$ ) with at least 10% methylation in wild-type Col-0 was extracted from data of (Stroud et al., 2013). The percentage of methylated sites was calculated ( $100*m/n$ ) and the mean average taken across the entire expression group (Figure S1A).



## IV. Supplemental References

Axtell, M.J. (2013). ShortStack: Comprehensive annotation and quantification of small RNA genes. *RNA* 19, 740-751.

Kozomara, A., and Griffiths-Jones, S. (2011). miRBase: integrating microRNA annotation and deep-sequencing data. *Nucleic Acids Res* 39, D152-157.

Langmead, B., Trapnell, C., Pop, M., and Salzberg, S.L. (2009). Ultrafast and memory-efficient alignment of short DNA sequences to the human genome. *Genome biology* 10, R25.

Law, J.A., Du, J., Hale, C.J., Feng, S., Krajewski, K., Palanca, A.M., Strahl, B.D., Patel, D.J., and Jacobsen, S.E. (2013). Polymerase IV occupancy at RNA-directed DNA methylation sites requires SHH1. *Nature*.

Mortazavi, A., Williams, B.A., McCue, K., Schaeffer, L., and Wold, B. (2008). Mapping and quantifying mammalian transcriptomes by RNA-Seq. *Nature methods* 5, 621-628.

Stroud, H., Greenberg, M.V., Feng, S., Bernatavichute, Y.V., and Jacobsen, S.E. (2013). Comprehensive analysis of silencing mutants reveals complex regulation of the Arabidopsis methylome. *Cell* 152, 352-364.

Tarazona, S., Furio-Tari, P., Ferrer, A., and Conesa, A. (2012). NOISeq: Exploratory analysis and differential expression for RNA-seq data. *R package version 1.1.5*.

Wickham, H. (2009). *ggplot2: elegant graphics for data analysis* (New York: Springer).
